# Supplementary material for: High quality polyacrylic acid modified multifunction luminescent nanorods for tri-modality bioimaging, in vivo long-lasting tracking and biodistribution
Source: Royal Society of Chemistry journal article supplement (doi:10.1039/c4nr05161k), 2014-11-21
Supplement: c4nr05161k1.pdf [file c4nr05161k1.pdf]

## Supporting Information

### High Quality Polyacrylic Acid Modified Multifunction Luminescent Nanorods for Tri-Modality Bioimaging, *In Vivo* Long-Lasting Tracking and Biodistribution

Zhigao Yi, Wei Lu, Hongrong Liu, and Songjun Zeng \*

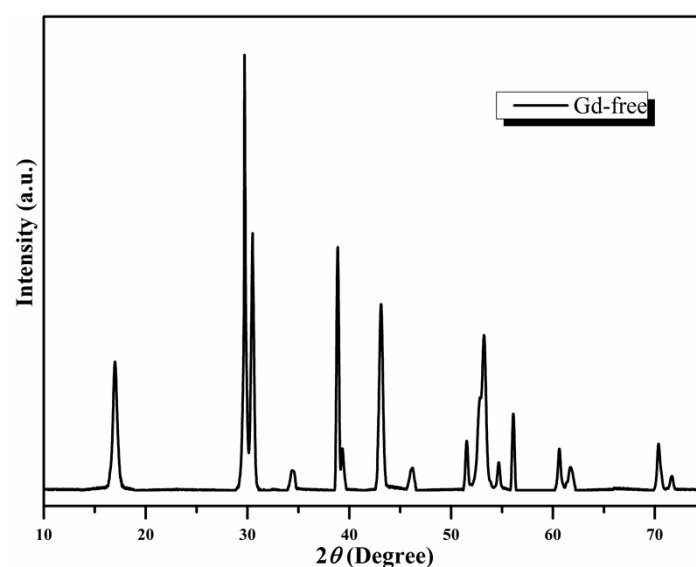

**Figure S1.** XRD pattern of the oleic acid capped NaYF<sub>4</sub>:Yb/Er UCNRs. Similar as the crystal phase and compositions of NaYF<sub>4</sub>:Gd/Yb/Er, the diffraction peaks of NaYF<sub>4</sub>:Yb/Er are all indexed as pure hexagonal phase NaYF<sub>4</sub> (JCPDS FILE No. 16-0334).

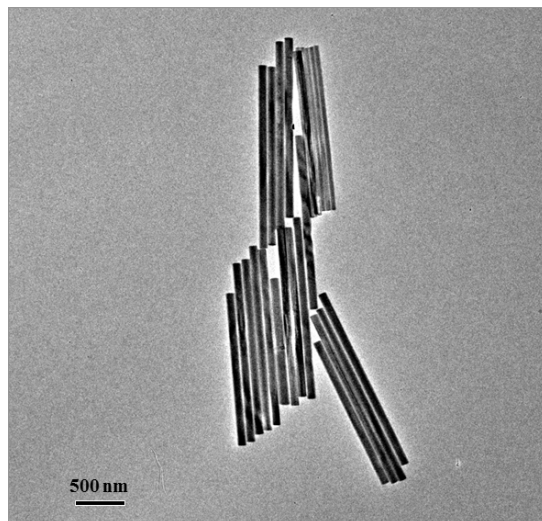

**Figure S2.** Typical TEM image of the oleic acid capped NaYF<sub>4</sub>:Yb/Er UCNRs.

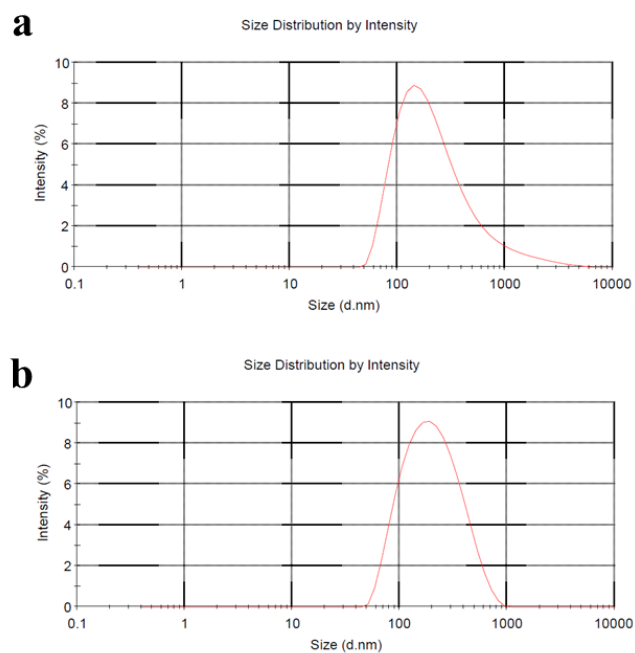

Figure S3. DLS of PAA-UCNRs (2 mg/mL) in (a) aqueous solution and (b) phosphate buffer solution (pH = 7.4)

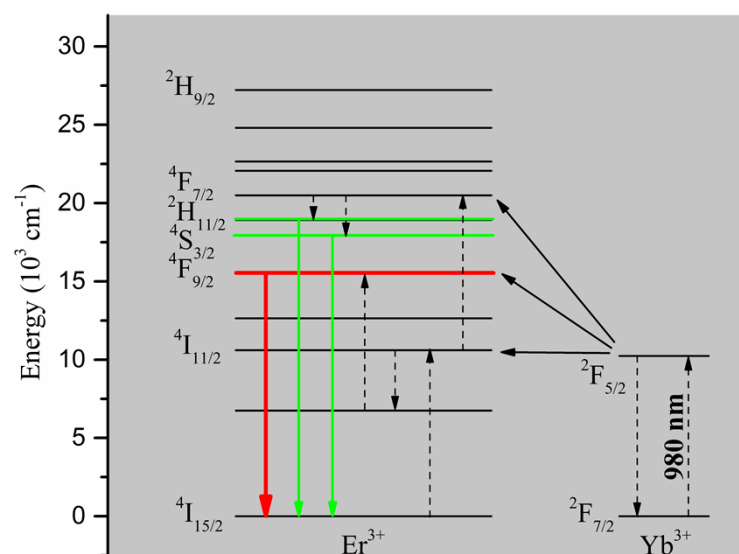

**Figure S4.** Schematic energy-level diagram of Yb<sup>3+</sup> and Er<sup>3+</sup> ions.

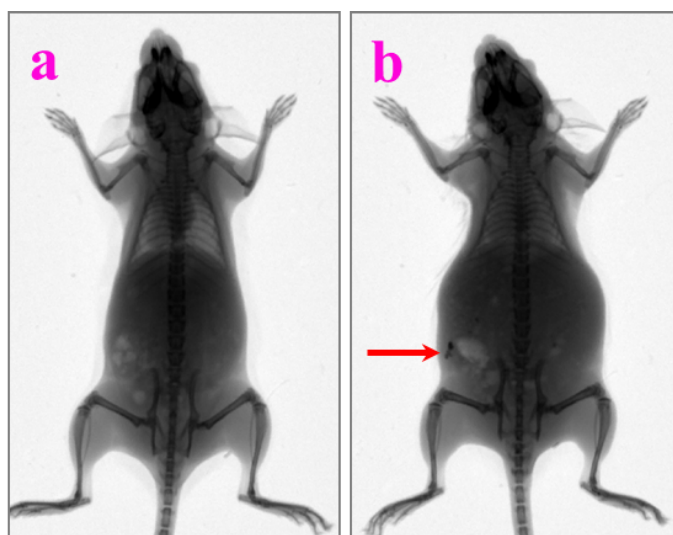

**Figure S5.** *In vivo* X-ray imaging of a Kunming mouse: (a) without and (b) with subcutaneous injection of PAA-UCNRs. The red arrow indicates the injected region.
